1  
2  
3  
4  
5  
6  
7  
8  
9  
10  
11  
12  
13  
14  
15  
16  
17  
18  
19  
20  
21  
22  
23

# Host-pathogen dynamics in longitudinal clinical specimens from patients with COVID-19

Michelle J. Lin<sup>1</sup>, Victoria M. Rachleff<sup>1,2,3</sup>, Hong Xie<sup>1</sup>, Lasata Shrestha<sup>1</sup>, Nicole A.P. Lieberman<sup>1</sup>,  
Vikas Peddu<sup>1</sup>, Amin Addetia<sup>1</sup>, Amanda M. Casto<sup>4</sup>, Nathan Breit<sup>1</sup>, Patrick C. Mathias<sup>1</sup>, Meei-Li  
Huang<sup>1,2</sup>, Keith R. Jerome<sup>\*¶1,2</sup>, Alexander L. Greninger<sup>\*¶1,2</sup>, Pavitra Roychoudhury<sup>\*¶1,2</sup>

<sup>1</sup>Department of Laboratory Medicine and Pathology, University of Washington School of  
Medicine

<sup>2</sup>Vaccine and Infectious Disease Division, Fred Hutchinson Cancer Research Center

<sup>3</sup>Program in Molecular and Cellular Biology, University of Washington School of Medicine

<sup>4</sup>Division of Allergy and Infectious Diseases, University of Washington School of Medicine

¶ Co-senior authors

\* Corresponding authors

**Abbreviations:** AF, allele frequency; Ct, cycle threshold; NP, nasopharyngeal; NTD, N-terminal  
domain; OP, oropharyngeal; RBD, receptor-binding domain; RPM, reads per million; RT-PCR,  
reverse transcription polymerase chain reaction; SD, standard deviation; UW, University of  
Washington

## 24 **Abstract**

### 25 **Background**

26 Rapid dissemination of SARS-CoV-2 sequencing data to public repositories has enabled  
27 widespread study of viral genomes, but studies of longitudinal specimens from infected persons  
28 are relatively limited. Analysis of longitudinal specimens enables understanding of how host  
29 immune pressures drive viral evolution *in vivo*.

### 30 **Methods and findings**

31 Here we performed sequencing of 49 longitudinal SARS-CoV-2-positive samples from  
32 20 patients in Washington State collected between March and September of 2020. Viral loads  
33 declined over time with an average increase in RT-PCR cycle threshold (Ct) of 0.87 per day. We  
34 found that there was negligible change in SARS-CoV-2 consensus sequences over time, but  
35 identified a number of nonsynonymous variants at low frequencies across the genome. We  
36 observed enrichment for a relatively small number of these variants, all of which are now seen  
37 in consensus genomes across the globe at low prevalence. In one patient, we saw rapid  
38 emergence of various low-level deletion variants at the N-terminal domain of the spike  
39 glycoprotein, some of which have previously been shown to be associated with reduced  
40 neutralization potency from sera. In a subset of samples that were sequenced using  
41 metagenomic methods, differential gene expression analysis showed a downregulation of  
42 cytoskeletal genes that was consistent with a loss of ciliated epithelium during infection and  
43 recovery. We also identified co-occurrence of bacterial species in samples from multiple  
44 hospitalized individuals.

### 45 **Conclusions**

46           These results demonstrate that the intrahost genetic composition of SARS-CoV-2 is  
47 dynamic during the course of COVID-19, and highlight the need for continued surveillance and  
48 deep sequencing of minor variants.

## 49 **Introduction**

50           SARS-CoV-2 is the cause of coronavirus disease 2019 (COVID-19). There have been  
51 over 138 million COVID-19 cases and over 2.9 million total deaths due to COVID-19 worldwide.  
52 Genomic analyses of longitudinal specimens within infected persons are critical to  
53 understanding the evolutionary trajectory of SARS-CoV-2. Sequencing of longitudinal samples  
54 from infected individuals allows examination of viral genetic diversity, host immune response,  
55 and dynamics of co-infecting pathogens over the course of infection and recovery. Within-host  
56 variants arise during viral replication and a number of processes shape their frequencies over  
57 time. These include selective pressures at different scales (molecular, immunological,  
58 epidemiological), host heterogeneity, spatial structure, population bottlenecks, and other  
59 stochastic processes [1]. Within-host variants may impact the success of vaccines and  
60 therapeutics, and a fraction of variants that arise will be transmitted between hosts and can  
61 eventually reach fixation in the population. Recent studies of within-host diversity of SARS-CoV-  
62 2 have demonstrated the presence of low levels of minor variants and infrequent emergence of  
63 escape mutations [2–6]. Of particular note, deletions in the N-terminal domain of the spike  
64 glycoprotein have been observed in chronically infected immunocompromised patients that are  
65 associated with SARS-CoV-2 escape from sera [7–10], and are present in current circulating  
66 lineages of concern.

67  
68           Here we examined longitudinal clinical specimens collected from 20 COVID-19-positive  
69 patients in Washington State. With metagenomic sequencing we identified changes in host

70 gene expression and bacterial co-occurrences, which may be associated with recovery. We  
71 found negligible change in viral consensus sequences over time, but detectable changes in  
72 variant allele frequencies that are only weakly predictive of future consensus changes across  
73 the globe. We further observed rapid emergence of deletion variants in the N-terminus domain  
74 of the spike glycoprotein in one patient, potentially suggesting within-host SARS-CoV-2 evasion  
75 of NTD-directed antibodies. Taken together our results support the limited emergence and  
76 fixation of escape variants during a typical infection, and also highlight the need to monitor  
77 minor variants due to their potential impact on vaccine and therapeutic efficacy.

## 78 **Methods**

### 79 **Sample collection and clinical testing for SARS-CoV-2**

80 Specimens were obtained as part of clinical testing for SARS-CoV-2 ordered by local  
81 healthcare providers or collected at drive-through testing sites. RNA was extracted and the  
82 presence of SARS-CoV-2 was detected by RT-PCR as previously described using either the  
83 emergency use-authorized UW CDC-based laboratory-developed test, Hologic Panther Fusion  
84 or Roche cobas SARS-CoV-2 tests [11,12].

85

### 86 **Chart review**

87 We reviewed clinical records of patients who received care within the UW network under  
88 University of Washington IRB: STUDY00000408. Information obtained from medical records  
89 included sex, age, comorbidities, medication, hospital or critical care admission, and discharge  
90 status.

91

### 92 **Sequencing and bioinformatic analysis**

93 Sequencing was attempted on all samples with a positive RT-PCR assay result that had  
94 a Ct  $\leq$ 36 using either a metagenomic approach described previously [13] via IDT probe-capture  
95 [14], or using Swift Biosciences' Normalase Amplicon Panel library preparation [15]. Libraries  
96 were sequenced on Illumina MiSeq, NextSeq, or NovaSeq instruments using 300, 150, 100, or  
97 75 bp reads. Consensus sequences were assembled using TAYLOR [15], a custom  
98 bioinformatics pipeline ([https://github.com/greninger-lab/covid\\_swift\\_pipeline](https://github.com/greninger-lab/covid_swift_pipeline)) with or without an  
99 additional primer clipping step depending on library preparation method. Consensus sequences  
100 were deposited to Genbank and GISAID [16], and raw reads to SRA under Bioproject  
101 PRJNA610428. Accessions are available in Supplementary Table 1.

102 Consensus sequences from each individual were aligned with the reference sequence  
103 NC\_045512 using MAFFT v7 [17]. Clade assignments were generated using Pangolin  
104 (<http://github.com/cov-lineages/pangolin>) and Nextstrain [18] in December 2020. Consensus  
105 sequences with  $<$ 5% Ns across the length of the genome were considered for further analysis.

106 Variants were also called with TAYLOR from aligned reads. Variants leading to coding  
107 changes with a sequencing depth of  $>$ 100 and an allele frequency  $>$ 0.01 were subjected to  
108 further analysis. We excluded mutations in the first 100 and last 50 bases, as well as variants  
109 determined to be due to sequencing error. Most samples were re-prepped and sequenced  
110 multiple times to ensure accuracy of variant calls. Variants at positions 6700, 11081-83, 19989,  
111 and 29056 were observed in a large number of samples but were determined to be the result of  
112 homopolymer sequencing error and were excluded.

113

## 114 **RNAseq analysis**

115 Reads were adapter and quality trimmed with Trimmomatic v0.39 [19] using the call  
116 "leading 3 trailing 3 slidingwindow:4:15 minlen 20", then pseudoaligned to the hg38-derived  
117 human transcriptome using Kallisto v0.46 [20]. Only samples with more than 900,000 reads  
118 pseudo-aligned to the human genome were used for analysis. Differential expression analysis

119 using the Wald test was performed using DEseq2 [21] and deemed significant at a Benjamini-  
120 Hochberg adjusted p value < 0.1. Statistical enrichment of Gene Ontology Biological Processes  
121 was performed on all significant genes using the R package clusterProfiler [22]. Raw counts  
122 have been submitted to the Gene Expression Omnibus, accession GSE173310.

123

124

## 125 **Metagenomic analysis**

126 Raw FASTQ files were analyzed using CLOMP v0.1.4  
127 (<https://github.com/FredHutch/CLOMP>) as previously described [23]. Samples with more than  
128 10 million reads were randomly down-sampled to 10 million reads before analysis using the  
129 “sample” command in seqtk (<https://github.com/lh3/seqtk>). The pipeline output was visualized  
130 using the Pavian metagenomic explorer [24], and reads per million (RPM) calculations were  
131 done using a custom R script. Results were filtered to highlight RPM counts for a shortlist of  
132 clinically relevant taxa (S4 Table). Samples were determined to be positive if the species level  
133 RPM was at least 30 for viruses, and 100 for bacteria.

## 134 **Results**

### 135 **Sequencing longitudinal samples from SARS-CoV2 infected individuals**

136 Residual clinical specimens were obtained from the University of Washington (UW)  
137 Virology Lab after testing for SARS-CoV-2 [25]. By reviewing our laboratory information system,  
138 we identified 20 individuals who had two or more positive or inconclusive samples collected  
139 between March and September 2020 (Table 1 and S1 Table). Inconclusive samples had at least  
140 one PCR target detected. A majority of samples came from inpatients who received care within  
141 the UW Medicine system, which includes UW Medical Center, Harborview Medical Center, and  
142 Northwest Hospital. Samples came from individuals with a mean age of 70 (range 42 – 99),

143 many with severe disease given the availability of multiple samples from these  
144 patients. Consistent with other reports [26], we observed that viral load declined over time in  
145 most patients with two or more positive or inconclusive samples with an average increase in RT-  
146 PCR cycle threshold (Ct) of 0.87 per day (Fig 1 and S1 Fig).

147

148

149

150 **Table 1. Demographics and clinical characteristics of patients included in study.**

| Characteristics                  | (N = 20) |
|----------------------------------|----------|
| <b>Mean age, y (SD)</b>          | 70 (18)  |
| <b>Male, n (%)</b>               | 13 (65)  |
| <b>Race, n (%)</b>               |          |
| White                            | 12 (60)  |
| Asian                            | 4 (15)   |
| Black or African American        | 2 (10)   |
| American Indian or Alaska Native | 1 (5)    |
| Unknown or Unavailable           | 1 (5)    |
| <b>Comorbidities, n (%)</b>      |          |
| Hypertension                     | 10 (50)  |
| Diabetes                         | 7 (35)   |
| Obesity                          | 2 (10)   |
| Asthma                           | 1 (5)    |
| <b>Treatment, n (%)</b>          |          |
| Convalescent Plasma              | 2 (10)   |
| Hydroxychloroquine               | 2 (10)   |
| Azithromycin                     | 5 (25)   |
| Tocilizumab                      | 1 (5)    |
| ACTT-1 Trial                     | 2 (10)   |

|                                 |         |
|---------------------------------|---------|
| No Treatment                    | 8 (40)  |
| Unknown                         | 4 (20)  |
| <b>Hospital outcomes, n (%)</b> |         |
| Hospital admission              | 14 (70) |
| ICU admission for COVID-19      | 4 (20)  |
| Survival to discharge           | 18 (90) |

151 Different categories (in bold) and their subcategories are shown in the first column, with their  
152 respective number of patients in the second column. In parentheses, standard deviation is  
153 indicated in the first row, and percentages for all other rows.

154 **Fig 1. Viral load dynamics in sequenced samples.**

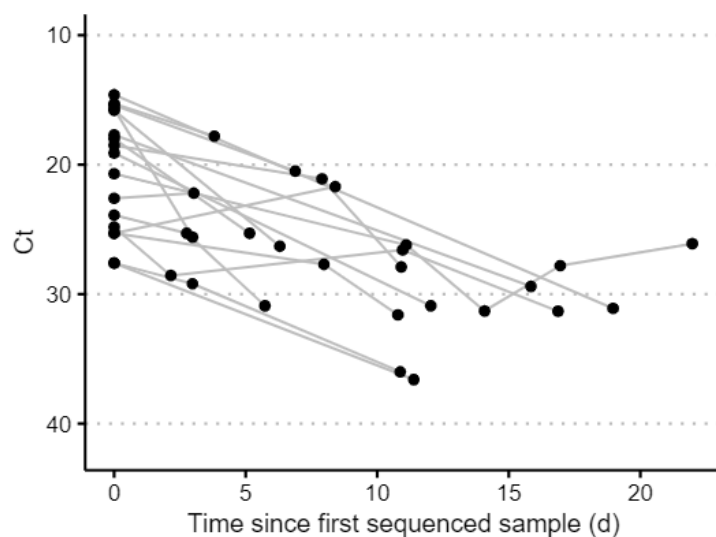

155  
156 Dots represent a unique sequenced sample. Lines connect samples from a single patient. Same  
157 day samples are not shown (see S1 Fig).

158  
159 A total of 49 samples (47 nasopharyngeal and 2 oropharyngeal swabs) were sequenced  
160 with sufficient reads to be included in this study (S2 Fig). Ct values for these samples ranged  
161 between 14.6 and 36.6. The length of time between collection dates for sequenced samples  
162 from the same individual ranged from 0 to 22 days. Samples collected on the same date were  
163 sequenced for three individuals. We sequenced nasopharyngeal and oropharyngeal samples



164 from P004 collected at the time of autopsy, two samples from P006 collected at the same time  
 165 during a hospital admission, and samples collected 9 hours apart from P012 during an  
 166 emergency room visit.

167

## 168 Negligible change in consensus sequences over time

169 We obtained full-length viral genome sequences with less than 2% unknown bases (Ns)  
 170 for two or more time points in 14 out of 20 individuals, plus an additional two individuals with  
 171 paired nasopharyngeal and oropharyngeal swabs collected at the same timepoint (Table 2, n =  
 172 38 sequences). After masking ambiguous sites and regions with sequencing or assembly errors,  
 173 we found no differences between the first and subsequent consensus sequences in 15 out of 16  
 174 patients. In one patient (P001), two samples collected 3 days apart had 4 differences between  
 175 their consensus sequences at reference positions 15418 (G/T), 26262 (G/T), 27899 (T/A), and  
 176 27944 (T/C). Two of these differences lead to coding changes (A660S in nsp12 and Q2K in  
 177 ORF8). Variant alleles were observed for all four positions at low frequencies in the earlier  
 178 sample.

179

180 **Table 2: Consensus sequence analysis of SARS-CoV-2 in longitudinal specimens.**

| Patient | Sample # | Days since symptom onset | Ct Value | %Ns  | Clade (Nextclade/Pangolin) | Number of nt differences relative to first sample |
|---------|----------|--------------------------|----------|------|----------------------------|---------------------------------------------------|
| P001    | 1        | Asymptomatic             | 22.6     | 0.0% | 19B/A.1                    | -                                                 |
|         | 2        | 3**                      | 22.2     | 0.0% |                            | 4                                                 |
| P003    | 1        | Unknown                  | 18.0     | 0.0% | 19B/A.1                    | -                                                 |
|         | 2        | 5**                      | 25.3     | 0.0% |                            | 0                                                 |
| P005    | 1        | 0*                       | 19.1     | 0.3% | 19B/A.1                    | -                                                 |
|         | 2        | 12                       | 30.9     | 0.0% |                            | 0                                                 |
| P006    | 1        | Asymptomatic             | 25.6     | 0.0% | 19B/A.1                    | -                                                 |
|         | 2        | 0**                      | 29.7     | 0.0% |                            | 0                                                 |
| P007    | 1        | 0*                       | 15.8     | 0.0% | 19B/A.1                    | -                                                 |
|         | 2        | 6                        | 26.3     | 0.0% |                            | 0                                                 |
| P008    | 1        | 0*                       | 17.7     | 0.0% | 19B/A.1                    | -                                                 |

|      |   |              |      |      |              |   |
|------|---|--------------|------|------|--------------|---|
|      | 2 | 16           | 29.4 | 0.0% |              | 0 |
| P009 | 1 | 0*           | 25.3 | 0.0% | 20C/B.1.21   | - |
|      | 2 | 9            | 21.7 | 0.0% |              | 0 |
| P010 | 1 | -7           | 20.7 | 0.0% | 19B/A.1      | - |
|      | 2 | 4            | 26.2 | 0.0% |              | 0 |
|      | 3 | 7            | 31.3 | 0.0% |              | 0 |
|      | 4 | 15           | 26.1 | 0.0% |              | 0 |
| P011 | 1 | 0            | 25.3 | 0.5% | 20C/B.1.21   | - |
|      | 2 | 8            | 27.7 | 0.0% | 20C/B.1.21   | 0 |
|      | 3 | 11           | 31.6 | 0.1% |              | 0 |
| P012 | 1 | 5            | 21.6 | 0.7% | 20C/B.1.21   | - |
|      | 2 | 5            | 19.8 | 0.0% |              | 0 |
| P014 | 1 | Asymptomatic | 27.6 | 0.0% | 19B/A.1      | - |
|      | 2 | 3**          | 29.2 | 1.6% |              | 0 |
| P015 | 1 | 3            | 18.5 | 0.0% | 19B/A.1      | - |
|      | 2 | 11           | 21.1 | 0.0% |              | 0 |
|      | 3 | 14           | 27.9 | 0.0% |              | 0 |
| P016 | 1 | 16           | 23.9 | 0.0% | 20C/B.1      | - |
|      | 2 | 19           | 25.3 | 0.0% |              | 0 |
|      | 3 | 22           | 30.9 | 0.0% |              | 0 |
| P017 | 1 | 10           | 24.8 | 0.0% | 19B/A.1      | - |
|      | 2 | 13           | 28.6 | 0.0% |              | 0 |
|      | 3 | 21           | 26.6 | 0.0% |              | 0 |
| P018 | 1 | Unknown      | 15.3 | 0.0% | 20B/B.1.1.77 | - |
|      | 2 | 3**          | 17.8 | 0.0% |              | 0 |
| P019 | 1 | Unknown      | 14.6 | 0.0% | 20A/B.1      | - |
|      | 2 | 19**         | 31.1 | 0.3% |              | 0 |

181 All patients with less than 2% unknown bases (Ns) are included. The last column indicates  
 182 nucleotide differences compared to the first sample collected for each respective patient. One  
 183 asterisk (\*) indicates symptoms were present at first time point but exact date of symptom onset  
 184 is unknown. Two asterisks (\*\*) indicate days since first sample.

185

## 186 **Low frequency variants detected across the genome**

187 We analyzed intrahost viral genetic variation by examining all sites with >100x locus  
 188 depth, masking known problematic sites (see Methods). We examined sites in 47 samples from

189 20 different patients and found a total of 1267 unique non-synonymous variants relative to the  
190 Wuhan-Hu-1 (NC\_045512.2) reference genome present at frequencies between 5-95% (Fig 2).  
191 nsp3 had the highest number of variant sites (286, 22.57%), followed by the spike glycoprotein  
192 (186, 14.68%) and nsp12 (133, 10.50%). When adjusted for gene length, mutations are most  
193 prevalent in nsp2 (103, 8.13%), at 0.053 variant sites per nucleotide. Variant frequencies were  
194 reproducible across replicates (S2 Fig).

195 **Fig 2. Low frequency variation is abundant but only a small number of variants exhibit a**  
196 **significant change in allele frequency over the course of infection.**

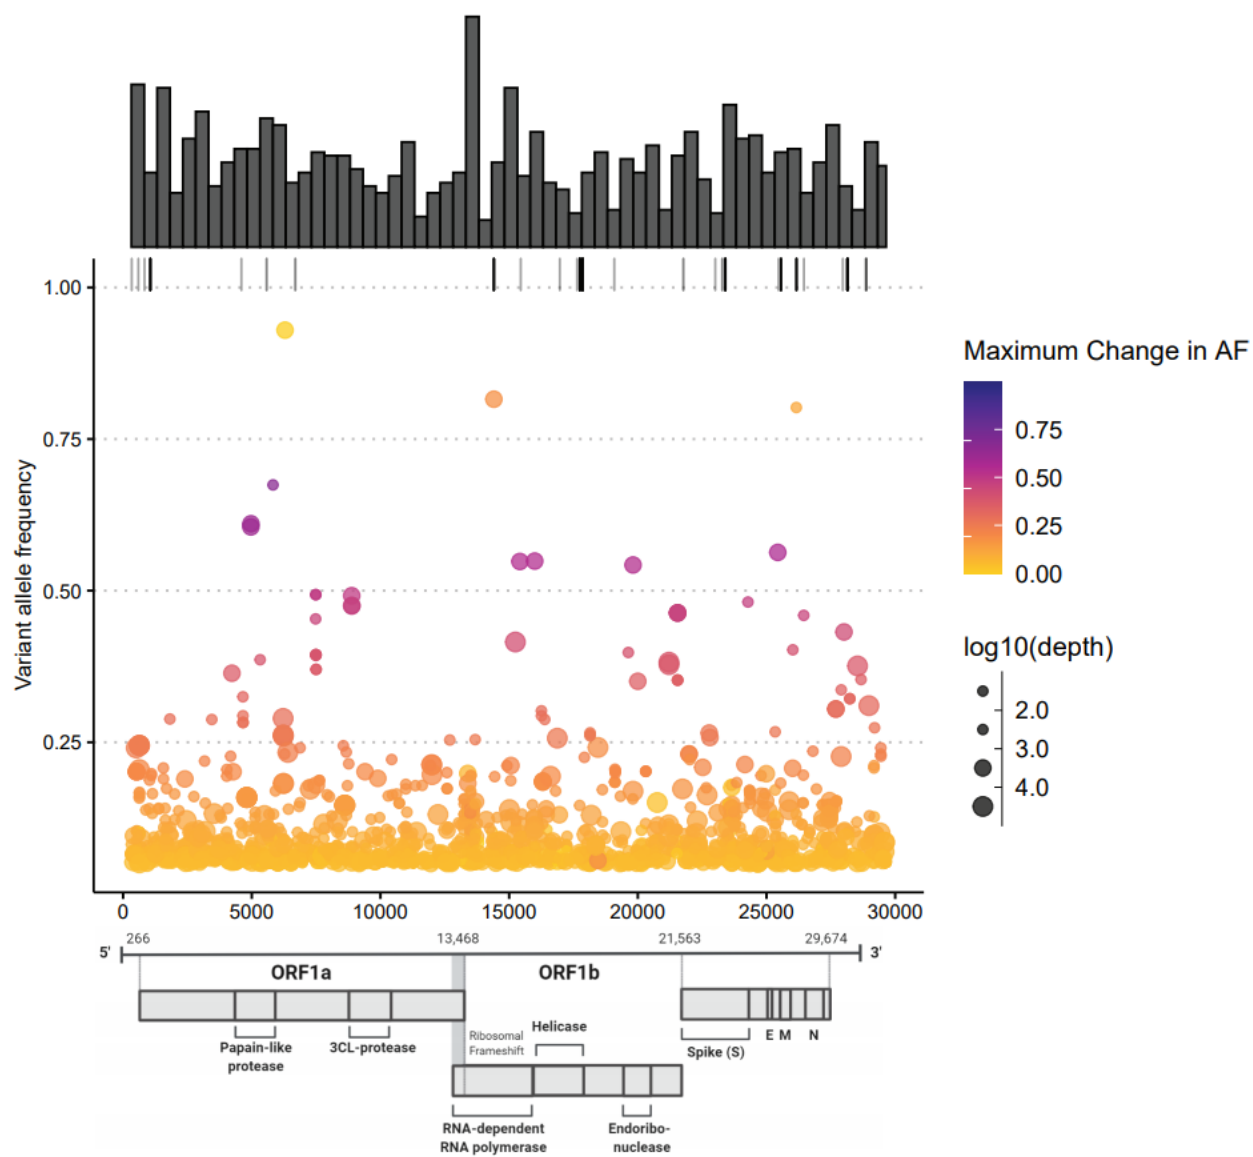

197 Each dot represents a coding change in a single sample relative to the Wuhan-Hu-1  
198

199 (NC\_045512.2) reference genome with variant allele frequency between 5-95% and at least  
200 100x coverage at the site. Color scale represents the change in allele frequency across time  
201 points in the same patient with darker colors representing variants that had greater changes in  
202 frequency across samples. Small dark grey marks along the top margin shows positions with  
203 variant frequencies >95% (fixed mutations relative to the reference). Size of circles indicates  
204 sequencing depth at the site. Marginal histogram shows distribution of variants using bin width  
205 of 500 nt.

206  
207  
208 Of the seven most commonly observed variants in our dataset (Table 3), the three most  
209 frequent define the Washington state outbreak clade [28,29] and the rest of the variants are  
210 clade-defining mutations in Nextstrain clades 20A and 20C. Nine out of 20 patients had the  
211 spike protein mutation D614G (A23403G), which has been associated with increased  
212 transmissibility and higher viral loads [30,31]. While this variant was rare at the beginning of the  
213 pandemic, it reached near fixation in the global SARS-CoV-2 population by June 2020 [32]. This  
214 rapid rise in prevalence is reflected in our data, as this D614G mutation is present in all three  
215 patients with samples collected during or after June 2020. In 10 out of the 11 patients with the  
216 614D variant, no alternate alleles were detected at this position. In the second sample from  
217 P007, 614G was detected with a variant allele frequency of 6.1%, but the read depth at this  
218 locus (82X) was insufficient to reach our QC standards.

219

220 **Table 3. Frequent non-synonymous variants observed in  $\geq 15$  samples (n=47).**

| Variant | AF Range | # Patients | # Samples | ORF: Effect                     |
|---------|----------|------------|-----------|---------------------------------|
| C17747T | 0.98 - 1 | 11         | 24        | ORF1ab: P5828L; helicase: P504L |
| A17858G | 0.98 - 1 | 11         | 24        | ORF1ab: Y5865C; helicase: Y541C |

|         |          |    |    |                             |
|---------|----------|----|----|-----------------------------|
| T28144C | 0.02 - 1 | 12 | 23 | ORF8: L84S                  |
| A23403G | 0.99 - 1 | 9  | 19 | S: D614G                    |
| C14408T | 0.02 - 1 | 10 | 17 | ORF1ab: P4715L; RdRp: P323L |
| G25563T | 0.03 - 1 | 8  | 15 | ORF3a: Q57H                 |
| C1059T  | 0.95 - 1 | 7  | 15 | ORF1a: T265I; nsp2: T85I    |

221

222 All variants called had at least 10 reads of support for the alternate allele. For the three variants  
223 with large ranges in allele frequency (T28144C, C14408T, G14408T),  $\leq 3$  outlier samples with  
224 variant AFs below 0.1 were present. When these samples are excluded, minimum AF increases  
225 to  $\geq 0.99$ .

226

227

## 228 **Variants exhibiting intra-host evolution are limited in prediction of future global** 229 **consensus changes and highlight SARS-CoV-2 antibody evasion**

230 We further examined variants that underwent a maximum allele frequency change of  
231  $\geq 20\%$  across timepoints within each patient. The derived alleles for all 25 non-synonymous  
232 amino acid changes meeting this criteria in our dataset were also observed among consensus  
233 genomes deposited in GISAID [16] by April 2021 (range: 1-2171, mean: 467.8, median: 86.5).  
234 Only 8 variants exhibited a maximum allele frequency change of  $\geq 40\%$ . The derived alleles for  
235 these variants were present in only 1-1751 GISAID sequences, which at the time of analysis  
236 represented a mere 0.0001-0.17% of all sequences deposited in GISAID (Fig 3A). Though the  
237 number of consensus sequences with these derived alleles was relatively low, these sequences  
238 were diverse with respect to collection date and geographic origin (Fig 3B).

239

240

241

242  
243  
244  
245  
246  
247  
248  
249  
250  
251

**Fig 3. Variants that exhibit  $\geq 40\%$  maximum change in allele frequency in the individuals profiled here in summer 2020 show limited ability to predict future GISAID consensus sequences as of April 2021.**

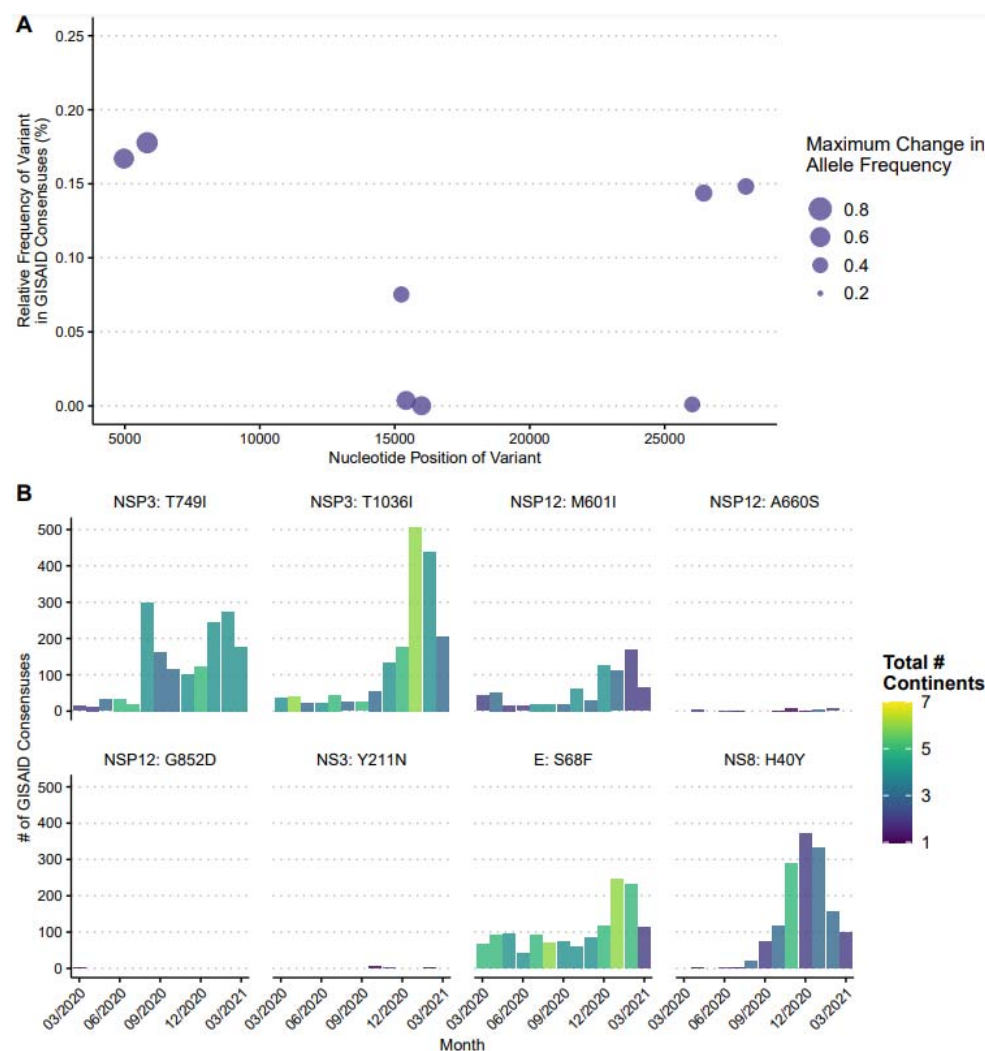

252

253 A) Relative frequencies of the derived allele found in GISAID consensus across the genome.  
254 Dots represent each unique variant with size indicating the maximum intra-host change in allele  
255 frequency found in our study. B) Number of GISAID consensus with the derived allele for  
256 each variant. Height of vertical bars represents the total number of consensus with the  
257 derived allele collected for each month from March 2020 to March 2021 and bar color  
258 represents the number of continents of origin for these consensus.

259 Three variants with a  $\geq 20\%$  within-host change in allele frequency localized to the spike  
260 glycoprotein (Fig 4A). None of these had an allele frequency change of  $\geq 50\%$ . In patient P016, a  
261 S:143-145 6-nucleotide deletion was observed at an allele frequency of 20.7% in patient sample  
262 2, but was not observed in samples collected 3 days prior and 3 days later. This patient was  
263 immunocompetent and not receiving any COVID-19 treatment. Interestingly, numerous other  
264 deletions arose at low frequencies in this patient, with the largest number present at day 0 (Fig  
265 4B). The most prevalent deletion variant in the day 0 sample (collected 16 days after initial  
266 symptom onset) was S: $\Delta$ 141-144 at 1.87% allele frequency. This deletion was the second most  
267 common variant in the day 3 sample at 1.2% allele frequency, but was not observed at all in the  
268 day 6 sample. Deletions in this region, including S: $\Delta$ 141-144, have previously been observed in  
269 chronically infected immunocompromised patients, and some are associated with escape from  
270 NTD-specific neutralizing antibodies or polyclonal sera [7–10,33].

271

272 **Fig 4. Variants that exhibit intra-host evolution in the spike protein across all patients.**

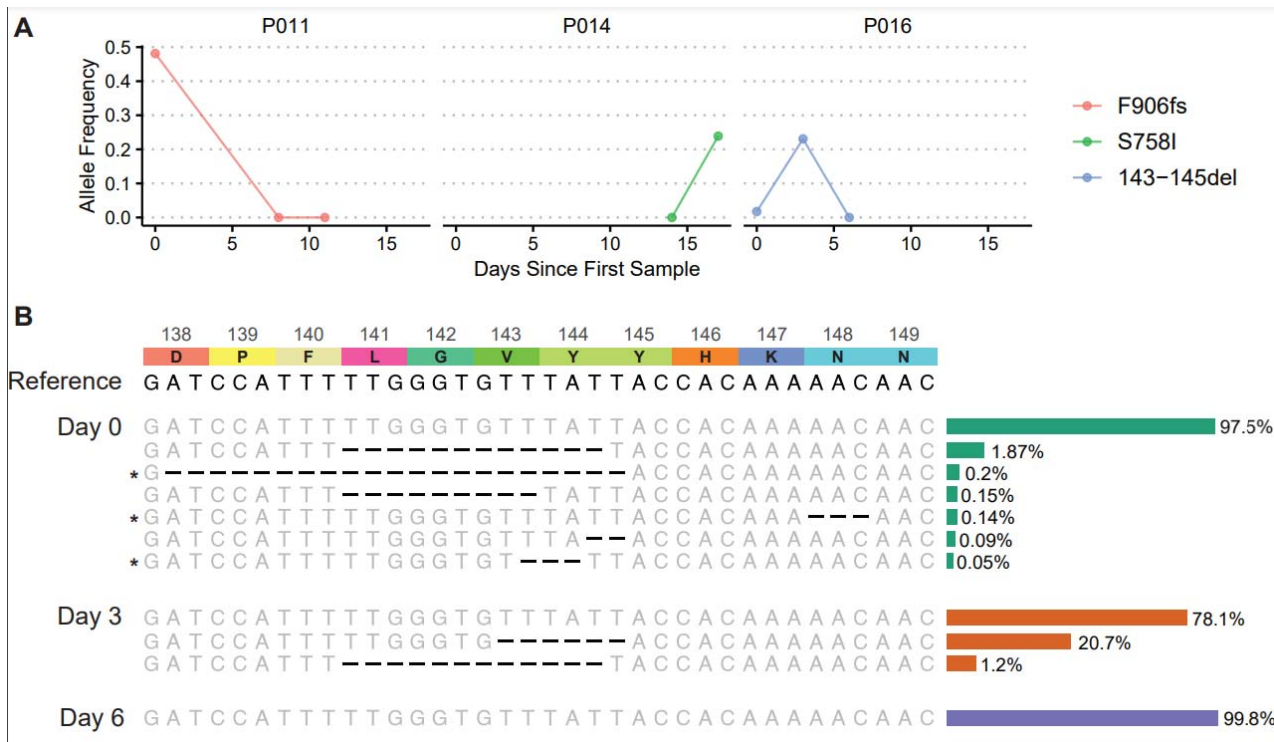

273

274 A) All non-synonymous variants located in the spike protein with a  $\geq 20\%$  change in allele  
 275 frequency among timepoints for any patient. B) Enumeration of deletions that arose between  
 276 residues 138-149 of the spike protein in P016 reveals a rapidly changing complement of low  
 277 frequency alleles present over a 6-day period. The reference nucleotide sequence (NC\_045512)  
 278 is located at the top of the sequence alignment. Above the reference is the corresponding amino  
 279 acid sequence with associated residue numbers. Alleles that match the reference are in gray,  
 280 and deletions are shown in black. Sequences marked with an asterisk (\*) may not have  
 281 deletions depicted in the correct location due to uncertainty of alignment. To the right of the  
 282 sequence alignment is a bar graph showing the square root of the relative frequency of each  
 283 variant, for visualization purposes.

284

285 **Longitudinal RNAseq analysis illustrates loss of ciliated epithelium during**  
 286 **infection**



287 For samples that were sequenced metagenomically, we pseudo-aligned reads to the  
288 human transcriptome to perform differential expression analysis comparing initial ( $t = 0$ )  
289 timepoints to later timepoints. Samples with more than 900,000 pseudo-aligned reads ( $n = 7$   
290 initial, 3 later timepoints) were included in the analysis to determine variation in host gene  
291 expression over time. We observed a dramatic downregulation of several cytoskeletal genes,  
292 particularly dynein heavy chain (*DNAH 2, 3, 5, 6, 7, 9, 10, 11, 12*), as well as *WDRs*, *MAP1A*,  
293 and others (Figure 4A, Supplementary Table 3). Gene Ontology analysis (Figure 4B) confirmed  
294 that downregulated genes are involved in biological processes associated with microtubule-  
295 based motility. This is consistent with the death of ciliated epithelial cells, which are enriched for  
296 transcripts encoding microtubule transport machinery [34], following SARS-CoV-2 infection. We  
297 observed upregulation of some actin cytoskeleton-related transcripts like *VAV1*, *VASP*, and  
298 *RhoF* [35]. We also observed downregulation of several interferon-stimulated genes, but these  
299 did not reach statistical significance in this small sample set.

300

301 **Fig 5. Differentially expressed genes during SARS-CoV-2 infection.**

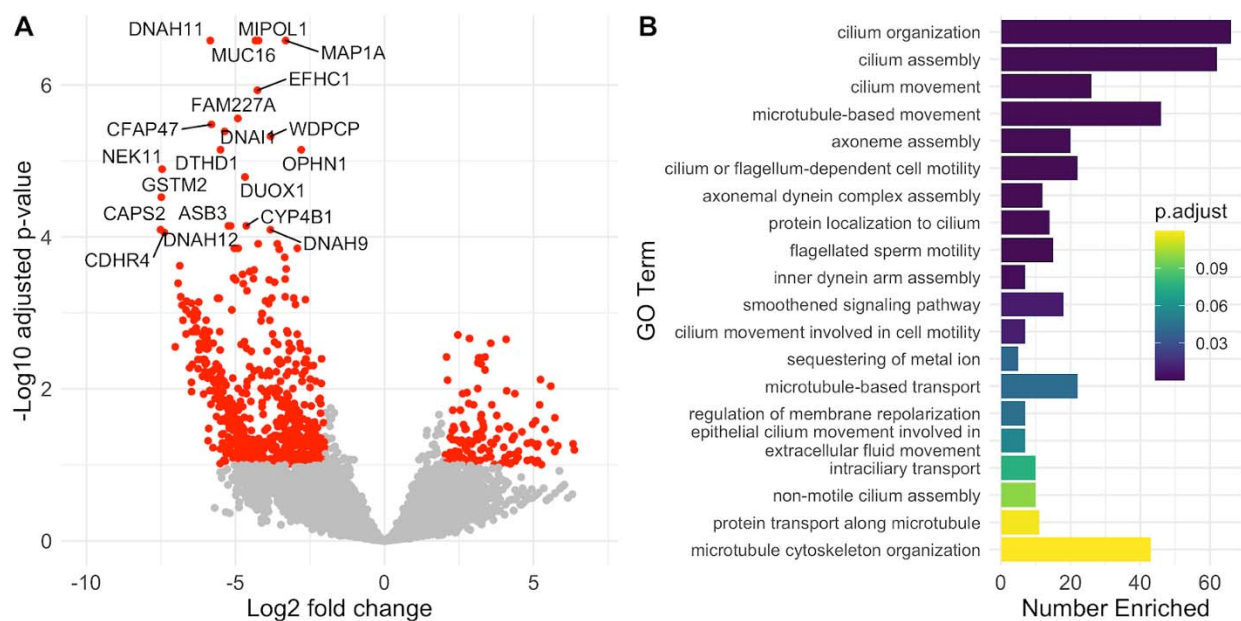

302

303 A) Twenty differentially expressed genes with lowest adjusted p-value. Fold changes are of later  
304 samples relative to initial samples. Genes highlighted in red have a log<sub>2</sub> fold change >2 and an  
305 adjusted p-value <0.1. B) Gene Ontology analysis reveals that differentially expressed genes  
306 are significantly enriched in biological processes related to microtubule-based motility. The  
307 twenty biological processes with the lowest adjusted p-values are shown. The length of the  
308 horizontal bars corresponds to the number of DE genes in each GO category ("Number  
309 Enriched). Bar color corresponds to the adjusted p-value for enrichment of DE genes in each  
310 pathway.

### 311

## 312 **Metagenomic analysis shows high levels of clinically relevant bacteria in three**

## 313 **samples**

314 We used a previously described metagenomic pipeline (CLOMP [23]) to perform  
315 taxonomic assignment of preprocessed reads. We excluded samples that had fewer than  
316 10,000 reads after trimming and any samples that underwent enrichment via probe-capture or  
317 amplicon-sequencing for SARS-CoV-2. A total of 24 samples from 11 patients were included in  
318 further analysis (Figure 5A, Supplementary Figure 3). No viruses aside from SARS-related  
319 coronaviruses met the required cutoffs to be classified as co-infections (see Methods). Multiple  
320 samples had detectable numbers of bacterial reads, in particular *Staphylococcus aureus* and  
321 *Moraxella catarrhalis*. Samples from two patients (P004, P005) had high detectable levels (>100  
322 RPM) of both bacteria at one or more time point(s) (Figure 5B). In patient P006, who had paired  
323 nasopharyngeal (NP) and oropharyngeal (OP) swabs collected at the same time point, we  
324 detected *Capnocytophaga gingivalis*, *Capnocytophaga leadbetteri*, and *Streptococcus*  
325 *parasanguinis* in the OP swab at 21,960, 9,475, and 4,476 RPM, respectively. All three species  
326 of bacteria commonly colonize the oropharynx. In contrast, in the NP swab, the predominant  
327 species of bacteria was a common skin colonizer, *Cutibacterium acnes*, at 824 RPM. In P010,  
328 we found a large number of reads corresponding to *Corynebacterium* spp. at one time point.

329 Upon review of medical records, we found no mention of bacterial co-infections or of positive  
330 bacterial cultures in the charts for P004 or P006. P005 had a nares culture that grew methicillin-  
331 resistant *Staphylococcus aureus* three months prior to SARS-CoV-2 infection.

332

333 **Fig 6. Dynamics of metagenomically classified pathogens.**

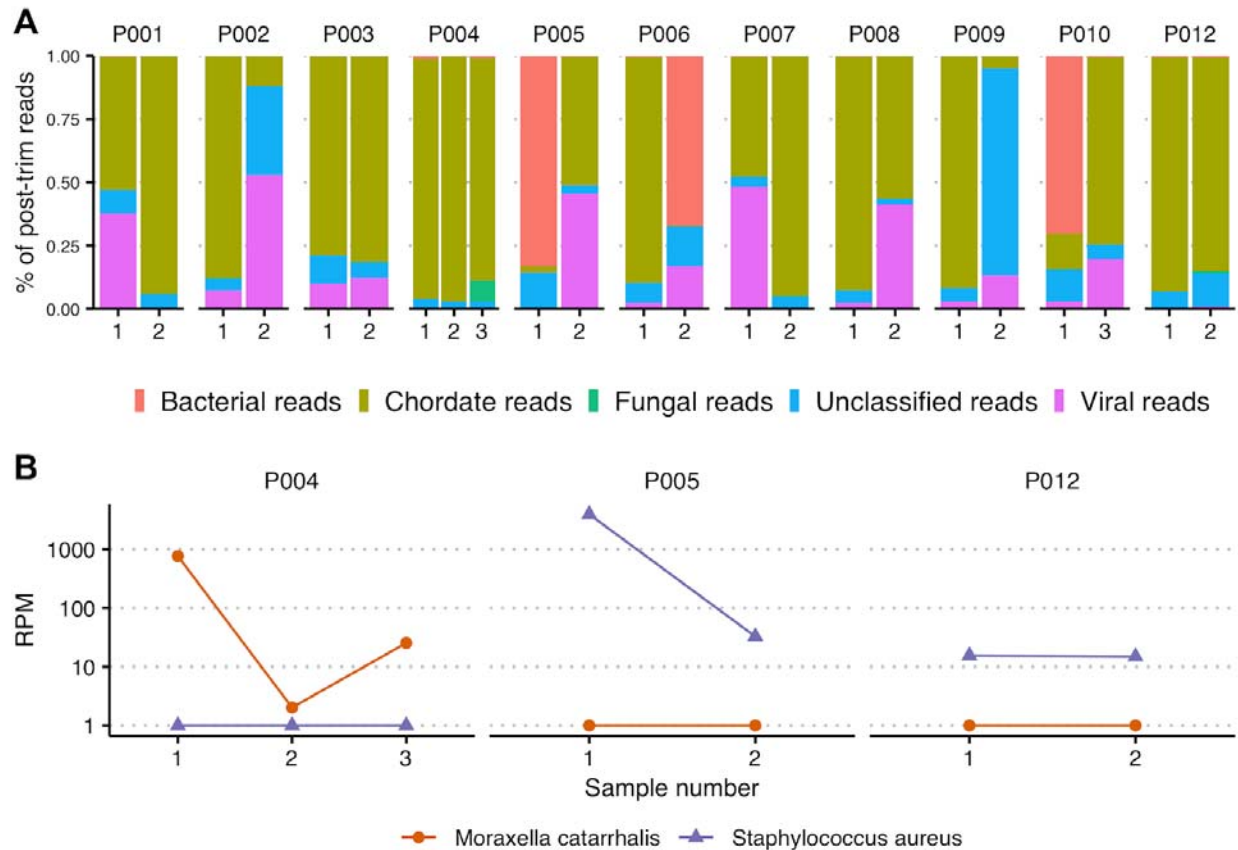

334 A) Summary of read classifications from CLOMP. Individual bars represent unique samples  
335 collected from each patient. Colors correspond to different taxonomic classifications. Reads  
336 mapping to SARS-CoV-2 are included in the “Viral reads.” B) Longitudinal RPM values for  
337 *Moraxella catarrhalis* and *Staphylococcus aureus* detected by metagenomic analysis.  
338

339

## 340 Discussion

341 In this study, we performed high-throughput sequencing of longitudinal clinical  
342 specimens that were positive for SARS-CoV-2 by RT-PCR. Most samples were sequenced  
343 using a metagenomic approach, which enabled us to simultaneously derive information about  
344 viral evolution, host transcription, and the presence of other organisms within patient samples.

345           We showed that although the viral consensus sequence remains largely unchanged over  
346 the course of infection, there is a relative abundance of genome-wide low-frequency variants.  
347 Similar to other studies, we saw a wide range in the number of variants detected across  
348 samples [36] and distribution of variants across the genome, though some positions appeared  
349 to be more prone to variation [2,36]. Studies of SARS-CoV-2 and other respiratory viruses  
350 [1,6,7,37] have demonstrated the transmission of minor variants and the role of these population  
351 bottlenecks on viral evolution, underscoring the importance of studying within-host viral  
352 variation. All variants demonstrating significant longitudinal evolution in our sample set collected  
353 March-September 2020 have been observed in consensus sequences from around the globe  
354 [16], albeit at relatively low prevalence.

355           In one patient, we observed rapid turnover of multiple deletion variants in the N-terminal  
356 domain of the spike glycoprotein, which has previously been seen in persistent infection in  
357 immunocompromised individuals and has been associated with viral escape of neutralizing  
358 antibodies [7,9,33,38]. Deletions in the NTD are of particular significance due to their presence  
359 in currently circulating lineages of concern. Here we show the emergence of a deletion in this  
360 genomic region in an immunocompetent background, suggesting that SARS-CoV-2 can rapidly  
361 evolve to escape neutralization within a time span of 1-2 days. It is unclear if the absence of this  
362 mutation at day 6 is due to successful clearance of the NTD variant or lack of detection of the  
363 minor allele associated with lower copy numbers. In addition, while some of these low frequency  
364 deletion alleles have been previously shown to arise independently in different patients in  
365 response to similar selection pressures [7], the presence of multiple low frequency deletion  
366 alleles within the same patient may be the product of parallel within-host microevolutionary  
367 processes. Notably, we did not find any evolving variants selected for in the RBD, the main  
368 target for neutralizing activity of human plasma [39,40].

369

370 Individual host factors, such as the immune response and respiratory tract microbiome,  
371 may play an important role in viral persistence. In particular, because SARS-CoV-2 infection is  
372 slow to resolve, the adaptive immune response could drive within-host viral evolution as variants  
373 that can escape T-cell and antibody responses develop. Although we were underpowered to  
374 see specific evidence of an adaptive immune response being mounted against SARS-CoV-2 in  
375 the nasopharynx, detailed studies evaluating antibody and T-cell receptor repertoire changes  
376 throughout the course of infection could shed light on the role of immune pressure in the  
377 development of minor variants. Similarly, the relationship between bacterial colonization of the  
378 nasopharynx and the development or suppression of inflammation in response to SARS-CoV-2  
379 infection remains poorly understood.

380 As viral load decreases during recovery, it becomes more challenging to recover viral  
381 genomes. As a result, one of the limitations of our study is the variability in sequencing depth  
382 across samples and the difficulty in ensuring similar sequencing depth for samples from  
383 different time points. We used an amplicon sequencing-based approach described previously  
384 [27] to obtain near full-length genomes from low viral load samples (up to Ct values of 36). We  
385 also used multiple library preparations and performed re-sequencing to ensure the accuracy of  
386 variant calls.

387 Taken together, our results suggest that low frequency genomic variants emerge in  
388 immunocompetent individuals, but that these variants are unlikely to reach fixation. Given the  
389 emergence of rapidly spreading variants of concern over the past several months, the limited  
390 intra-host evolution observed in our dataset highlights the critical impact that a select few  
391 individual intra-host evolutionary events may have on the course of the global pandemic and the  
392 need for continual genomic surveillance.

393

394

395

396

## 397 **References**

- 398 1. Xue KS, Moncla LH, Bedford T, Bloom JD. Within-Host Evolution of Human Influenza  
399 Virus. *Trends Microbiol.* 2018 Sep;26(9):781–93.
- 400 2. van Dorp L, Acman M, Richard D, Shaw LP, Ford CE, Ormond L, et al. Emergence of  
401 genomic diversity and recurrent mutations in SARS-CoV-2. *Infect Genet Evol.* 2020  
402 Sep;83:104351.
- 403 3. Sashittal P, Luo Y, Peng J, El-Kebir M. Characterization of SARS-CoV-2 viral diversity  
404 within and across hosts. *BioRxiv [Preprint]*. 2020 May [cited 2021 Mar 24]. Available  
405 from: <http://biorxiv.org/lookup/doi/10.1101/2020.05.07.083410>
- 406 4. Ramazzotti D, Angaroni F, Maspero D, Gambacorti-Passerini C, Antoniotti M, Graudenzi  
407 A, et al. VERSO: A comprehensive framework for the inference of robust phylogenies  
408 and the quantification of intra-host genomic diversity of viral samples. *Patterns.* 2021  
409 Mar;2(3):100212.
- 410 5. Rose R, Nolan DJ, Moot S, Feehan A, Cross S, Garcia-Diaz J, et al. Intra-host site-  
411 specific polymorphisms of SARS-CoV-2 is consistent across multiple samples and  
412 methodologies. *MedRxiv [Preprint]*. 2020 Apr [cited 2021 Mar 24]. Available from:  
413 <http://medrxiv.org/lookup/doi/10.1101/2020.04.24.20078691>
- 414 6. Lythgoe KA, Hall M, Ferretti L, de Cesare M, MacIntyre-Cockett G, Trebes A, et al.  
415 SARS-CoV-2 within-host diversity and transmission. *Science.* 2021 Mar 9;eabg0821.
- 416 7. McCarthy KR, Rennick LJ, Nambulli S, Robinson-McCarthy LR, Bain WG, Haidar G, et  
417 al. Recurrent deletions in the SARS-CoV-2 spike glycoprotein drive antibody escape.  
418 *Science.* 2021 Mar 12;371(6534):1139–42.

- 419 8. Chen L, Zody MC, Mediavilla JR, Cunningham MH, Composto K, Chow KF, et al.  
420 Emergence of multiple SARS-CoV-2 antibody escape variants in an  
421 immunocompromised host undergoing convalescent plasma treatment [Internet].  
422 Infectious Diseases (except HIV/AIDS); 2021 Apr [cited 2021 Apr 14]. Available from:  
423 <http://medrxiv.org/lookup/doi/10.1101/2021.04.08.21254791>
- 424 9. McCallum M, De Marco A, Lempp FA, Tortorici MA, Pinto D, Walls AC, et al. N-terminal  
425 domain antigenic mapping reveals a site of vulnerability for SARS-CoV-2. *Cell*. 2021  
426 Mar;S0092867421003561.
- 427 10. Andreano E, Piccini G, Licastro D, Casalino L, Johnson NV, Paciello I, et al. SARS-CoV-  
428 2 escape *in vitro* from a highly neutralizing COVID-19 convalescent plasma. *BioRxiv*  
429 [Preprint]. 2020 Dec [cited 2021 Apr 17]. Available from:  
430 <http://biorxiv.org/lookup/doi/10.1101/2020.12.28.424451>
- 431 11. Perchetti GA, Nalla AK, Huang M-L, Zhu H, Wei Y, Stensland L, et al. Validation of  
432 SARS-CoV-2 detection across multiple specimen types. *J Clin Virol*. 2020  
433 Jul;128:104438.
- 434 12. Perchetti GA, Sullivan K-W, Pepper G, Huang M-L, Breit N, Mathias P, et al. Pooling of  
435 SARS-CoV-2 samples to increase molecular testing throughput. *J Clin Virol*. 2020  
436 Oct;131:104570.
- 437 13. Greninger AL, Zerr DM, Qin X, Adler AL, Sampoleo R, Kuypers JM, et al. Rapid  
438 Metagenomic Next-Generation Sequencing during an Investigation of Hospital-Acquired  
439 Human Parainfluenza Virus 3 Infections. *J Clin Microbiol*. 2017 Jan;55(1):177–82.
- 440 14. Greninger AL, Roychoudhury P, Xie H, Casto A, Cent A, Pepper G, et al. Ultrasensitive  
441 Capture of Human Herpes Simplex Virus Genomes Directly from Clinical Samples  
442 Reveals Extraordinarily Limited Evolution in Cell Culture. Fernandez-Sesma A, editor.  
443 *mSphere*. 2018 Jun 13;3(3):e00283-18, /msphere/3/3/mSphere283-18.atom.



- 444 15. Addetia A, Lin MJ, Peddu V, Roychoudhury P, Jerome KR, Greninger AL. Sensitive  
445 Recovery of Complete SARS-CoV-2 Genomes from Clinical Samples by Use of Swift  
446 Biosciences' SARS-CoV-2 Multiplex Amplicon Sequencing Panel. Dekker JP, editor. J  
447 Clin Microbiol. 2020 Dec 17;59(1):JCM.02226-20, e02226-20.
- 448 16. Shu Y, McCauley J. GISAID: Global initiative on sharing all influenza data – from vision  
449 to reality. Eurosurveillance [Internet]. 2017 Mar 30 [cited 2021 Mar 24];22(13). Available  
450 from: [https://www.eurosurveillance.org/content/10.2807/1560-](https://www.eurosurveillance.org/content/10.2807/1560-7917.ES.2017.22.13.30494)  
451 [7917.ES.2017.22.13.30494](https://www.eurosurveillance.org/content/10.2807/1560-7917.ES.2017.22.13.30494)
- 452 17. Katoh K, Standley DM. MAFFT Multiple Sequence Alignment Software Version 7:  
453 Improvements in Performance and Usability. Mol Biol Evol. 2013 Apr 1;30(4):772–80.
- 454 18. Hadfield J, Megill C, Bell SM, Huddleston J, Potter B, Callender C, et al. Nextstrain: real-  
455 time tracking of pathogen evolution. Kelso J, editor. Bioinformatics. 2018 Dec  
456 1;34(23):4121–3.
- 457 19. Bolger AM, Lohse M, Usadel B. Trimmomatic: a flexible trimmer for Illumina sequence  
458 data. Bioinformatics. 2014 Aug 1;30(15):2114–20.
- 459 20. Bray NL, Pimentel H, Melsted P, Pachter L. Near-optimal probabilistic RNA-seq  
460 quantification. Nat Biotechnol. 2016 May;34(5):525–7.
- 461 21. Love MI, Huber W, Anders S. Moderated estimation of fold change and dispersion for  
462 RNA-seq data with DESeq2. Genome Biol. 2014 Dec;15(12):550.
- 463 22. Yu G, Wang L-G, Han Y, He Q-Y. clusterProfiler: an R package for comparing biological  
464 themes among gene clusters. Omics J Integr Biol. 2012 May;16(5):284–7.
- 465 23. Peddu V, Shean RC, Xie H, Shrestha L, Perchetti GA, Minot SS, et al. Metagenomic  
466 Analysis Reveals Clinical SARS-CoV-2 Infection and Bacterial or Viral Superinfection  
467 and Colonization. Clin Chem. 2020 Jul 1;66(7):966–72.

- 468 24. Breitwieser FP, Salzberg SL. Pavian: interactive analysis of metagenomics data for  
469 microbiome studies and pathogen identification. Schwartz R, editor. *Bioinformatics*. 2020  
470 Feb 15;36(4):1303–4.
- 471 25. Nalla AK, Casto AM, Huang M-LW, Perchetti GA, Sampoleo R, Shrestha L, et al.  
472 Comparative Performance of SARS-CoV-2 Detection Assays Using Seven Different  
473 Primer-Probe Sets and One Assay Kit. McAdam AJ, editor. *J Clin Microbiol*. 2020 Apr  
474 8;58(6):e00557-20, /jcm/58/6/JCM.00557-20.atom.
- 475 26. He X, Lau EHY, Wu P, Deng X, Wang J, Hao X, et al. Temporal dynamics in viral  
476 shedding and transmissibility of COVID-19. *Nat Med*. 2020 May;26(5):672–5.
- 477 27. Addetia A, Xie H, Roychoudhury P, Shrestha L, Loprieno M, Huang M-L, et al.  
478 Identification of multiple large deletions in ORF7a resulting in in-frame gene fusions in  
479 clinical SARS-CoV-2 isolates. *J Clin Virol*. 2020 Aug;129:104523.
- 480 28. Bedford T, Greninger AL, Roychoudhury P, Starita LM, Famulare M, Huang M-L, et al.  
481 Cryptic transmission of SARS-CoV-2 in Washington state. *Science*. 2020 Oct  
482 30;370(6516):571–5.
- 483 29. Worobey M, Pekar J, Larsen BB, Nelson MI, Hill V, Joy JB, et al. The emergence of  
484 SARS-CoV-2 in Europe and North America. *Science*. 2020 Oct 30;370(6516):564–70.
- 485 30. Korber B, Fischer WM, Gnanakaran S, Yoon H, Theiler J, Abfalterer W, et al. Tracking  
486 Changes in SARS-CoV-2 Spike: Evidence that D614G Increases Infectivity of the  
487 COVID-19 Virus. *Cell*. 2020 Aug;182(4):812-827.e19.
- 488 31. Müller NF, Wagner C, Frazar CD, Roychoudhury P, Lee J, Moncla LH, et al. Viral  
489 genomes reveal patterns of the SARS-CoV-2 outbreak in Washington State. *MedRxiv*  
490 [Preprint]. 2020 Sep [cited 2021 Mar 24]. Available from:  
491 <http://medrxiv.org/lookup/doi/10.1101/2020.09.30.20204230>

- 492 32. Yurkovetskiy L, Wang X, Pascal KE, Tomkins-Tinch C, Nyalile TP, Wang Y, et al.  
493 Structural and Functional Analysis of the D614G SARS-CoV-2 Spike Protein Variant.  
494 Cell. 2020 Oct;183(3):739-751.e8.
- 495 33. Avanzato VA, Matson MJ, Seifert SN, Pryce R, Williamson BN, Anzick SL, et al. Case  
496 Study: Prolonged Infectious SARS-CoV-2 Shedding from an Asymptomatic  
497 Immunocompromised Individual with Cancer. Cell. 2020 Dec;183(7):1901-1912.e9.
- 498 34. Maiti AK, Mattéi M-G, Jorissen M, Volz A, Zeigler A, Bouvagnet P. Identification, tissue  
499 specific expression, and chromosomal localisation of several human dynein heavy chain  
500 genes. Eur J Hum Genet. 2000 Dec;8(12):923–32.
- 501 35. Zhu N, Wang W, Liu Z, Liang C, Wang W, Ye F, et al. Morphogenesis and cytopathic  
502 effect of SARS-CoV-2 infection in human airway epithelial cells. Nat Commun. 2020  
503 Dec;11(1):3910.
- 504 36. Shen Z, Xiao Y, Kang L, Ma W, Shi L, Zhang L, et al. Genomic Diversity of Severe Acute  
505 Respiratory Syndrome–Coronavirus 2 in Patients With Coronavirus Disease 2019. Clin  
506 Infect Dis. 2020 Jul 28;71(15):713–20.
- 507 37. Lythgoe KA, Hall M, Ferretti L, de Cesare M, MacIntyre-Cockett G, Trebes A, et al.  
508 Within-host genomics of SARS-CoV-2. BioRxiv [Preprint]. 2020 May [cited 2021 Mar 24].  
509 Available from: <http://biorxiv.org/lookup/doi/10.1101/2020.05.28.118992>
- 510 38. Choi B, Choudhary MC, Regan J, Sparks JA, Padera RF, Qiu X, et al. Persistence and  
511 Evolution of SARS-CoV-2 in an Immunocompromised Host. N Engl J Med. 2020 Dec  
512 3;383(23):2291–3.
- 513 39. Greaney AJ, Loes AN, Crawford KHD, Starr TN, Malone KD, Chu HY, et al.  
514 Comprehensive mapping of mutations in the SARS-CoV-2 receptor-binding domain that  
515 affect recognition by polyclonal human plasma antibodies. Cell Host Microbe. 2021  
516 Mar;29(3):463-476.e6.

517 40. Piccoli L, Park Y-J, Tortorici MA, Czudnochowski N, Walls AC, Beltramello M, et al.  
518 Mapping Neutralizing and Immunodominant Sites on the SARS-CoV-2 Spike Receptor-  
519 Binding Domain by Structure-Guided High-Resolution Serology. Cell. 2020  
520 Nov;183(4):1024-1042.e21.

521

522

523 **Supporting Information**

524 **S1 Fig. Viral loads for all patients included in the study with samples that returned**  
525 **positive (DET), negative (NDET, Ct >42), and inconclusive (INCON) result by RT-PCR.**

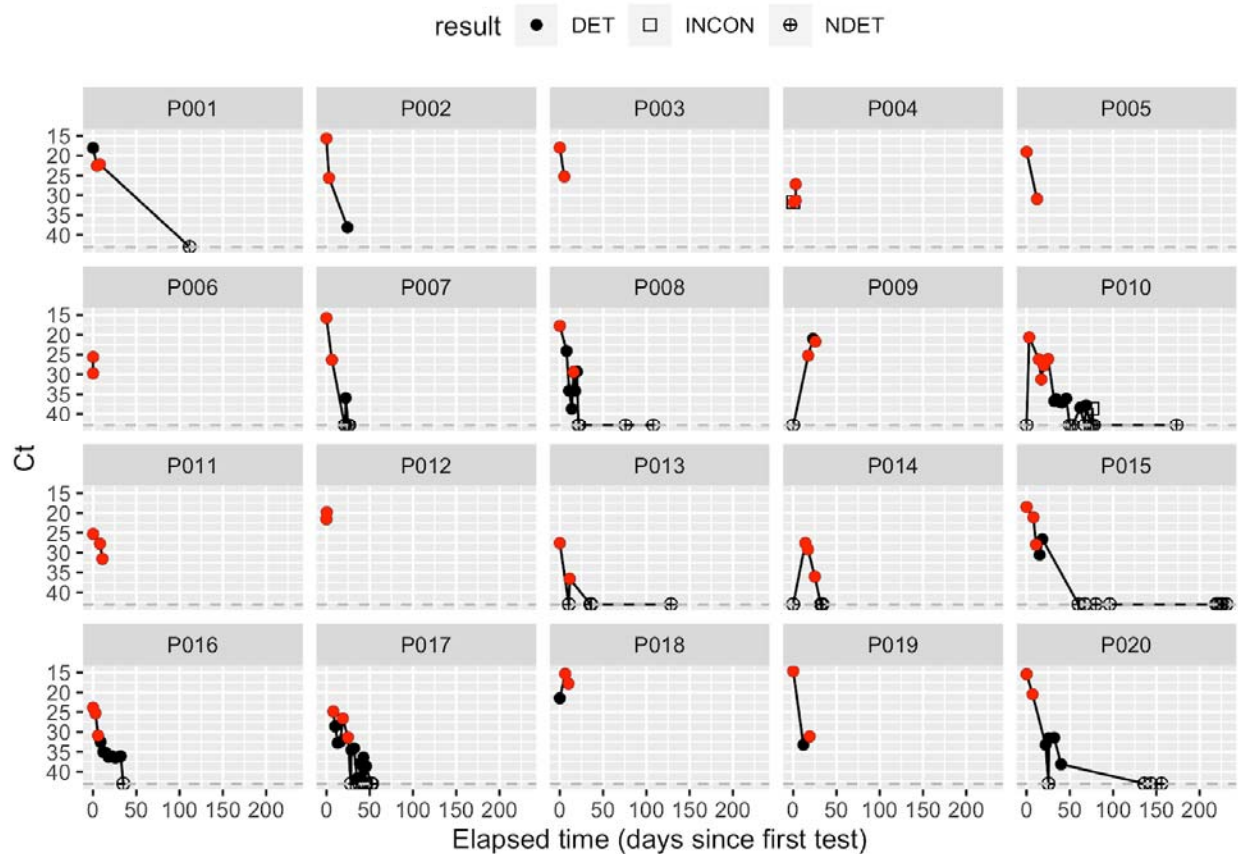

526  
527 Red dots represent samples for which we attempted sequencing for this study. Legend above  
528 the plot matches shapes of dots to respective RT-PCR results.

529  
530  
531  
532  
533  
534  
535

536 **S2 Fig. Sequencing quality and reproducibility.**

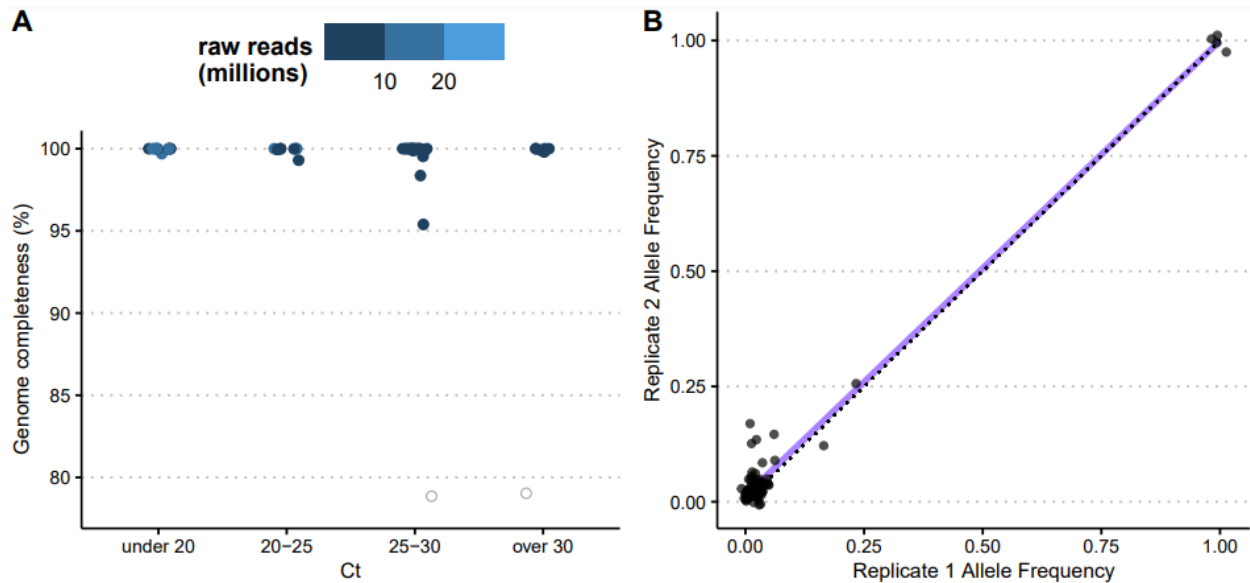

537  
538 (A) Samples were sequenced by metagenomic, probe-capture or amplicon-based approaches.  
539 Hollow circles show samples for which a consensus genome could not be recovered. Genome  
540 completeness indicates the percentage of non-N nucleotides in consensus sequence (an N was  
541 called when there was less than 5X coverage at a site). (B) Comparison of allele frequencies of  
542 variants across replicates of the same sample, collapsed across all samples. Each dot  
543 represents a variant with  $\geq 50$  total depth and  $\geq 10$  allelic depth in each replicate. Line of best fit  
544 is shown in purple, and  $x = y$  dotted line is shown in black.

545  
546  
547  
548  
549  
550  
551  
552  
553

554 **S3 Fig. Post-trimmed reads used as input to metagenomic analysis.**

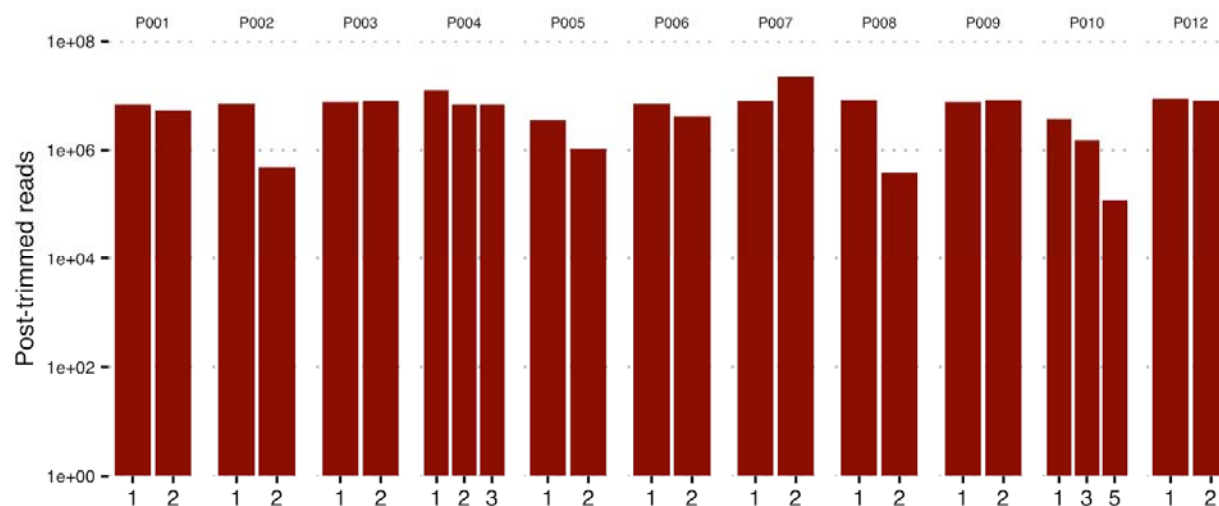

555  
 556 Samples with under 10,000 reads after trimming, and samples that underwent targeted  
 557 sequencing (non-metagenomic) were excluded from downstream analysis.

558

559 **S1 Table: Description of patients included in this study.**

| Patient | Age Range | Sex | Status when tested | Comorbidities                                                                                                                  | Treatment for COVID-19                  | Sample type(s) | Time points |
|---------|-----------|-----|--------------------|--------------------------------------------------------------------------------------------------------------------------------|-----------------------------------------|----------------|-------------|
| P001    | 70-75     | F   | NH                 | CLL, Hypogammaglobulinemia, Hypothyroidism                                                                                     | Hydroxychloroquine, Convalescent Plasma | NP             | 2           |
| P002    | 40-45     | M   | Unknown            | Asthma, Hypertension, Sleep Apnea                                                                                              | Azithromycin, ACTT-1 Trial              | NP             | 2           |
| P003    | 45-50     | M   | Unknown            | Unknown                                                                                                                        | Unknown                                 | NP             | 2           |
| P004    | 95-100    | M   | IP                 | Lewy Body Dementia, Coronary Artery Disease, Chronic Kidney Disease, Hypertension, Heart Failure, Benign Prostatic Hypertrophy | Azithromycin                            | NP, OP         | 3           |
| P005    | 90-95     | F   | OP                 | Dementia, Diabetes, Hypertension                                                                                               | Unknown                                 | NP             | 2           |
| P006    | 85-100    | F   | NH                 | Hypertension, Hyperlipidemia, Cardiomyopathy, Previous Stroke, Chronic Kidney                                                  | Unknown                                 | NP, OP         | 1           |

|      |        |   |        | Disease                                                                                                                     |                                         |    |   |
|------|--------|---|--------|-----------------------------------------------------------------------------------------------------------------------------|-----------------------------------------|----|---|
| P007 | 50-55  | M | OP, IP | Obesity, Protein S Deficiency, Hyperlipidemia, Sleep Apnea                                                                  | ACTT-1 Trial, Tocilizumab, Azithromycin | NP | 2 |
| P008 | 80-85  | F | ER, IP | Hypertension, Neurocognitive Disorder with delusions                                                                        | Hydroxychloroquine                      | NP | 2 |
| P009 | 70-75  | M | ER, IP | Heart Failure, COPD, Obesity, Sleep Apnea, Chronic Kidney Disease, Diabetes, Coronary Artery Disease,                       | None                                    | NP | 2 |
| P010 | 70-75  | M | IP     | Dementia, Benign Prostatic Hyperplasia                                                                                      | None                                    | NP | 4 |
| P011 | 80-85  | M | ER, IP | Diabetes, Hypertension, Hyperlipidemia, Chronic Kidney Disease                                                              | Azithromycin                            | NP | 3 |
| P012 | 50-55  | M | ER     | Chronic Hepatitis B                                                                                                         | None                                    | NP | 1 |
| P013 | 40-45  | M | ER, IP | Seizure Disorder, Chronic Kidney Disease, Sleep Apnea, Hypertension, Hyperlipidemia                                         | None                                    | NP | 2 |
| P014 | 80-85  | M | NH     | Dementia, Hypertension, Hyperlipidemia                                                                                      | None                                    | NP | 2 |
| P015 | 75-80  | F | ER, IP | Mitral Stenosis, Tachy-brady Syndrome, Coronary Artery Disease, Heart Failure, Kidney Transplant, Diabetes                  | None                                    | NP | 3 |
| P016 | 95-100 | F | IP     | Atrial Fibrillation, Sick Sinus Syndrome, Peripheral Vascular Disease, Hyperlipidemia, Hypertension, Chronic Kidney Disease | None                                    | NP | 2 |
| P017 | 75-80  | M | IP     | Atrial Fibrillation, Diabetes, Hypertension, Diabetes, Stroke, Aortic Stenosis                                              | Azithromycin                            | NP | 2 |



|      |       |   |    |                                                                                                                          |                                                                 |    |   |
|------|-------|---|----|--------------------------------------------------------------------------------------------------------------------------|-----------------------------------------------------------------|----|---|
| P018 | 65-70 | M | IP | Renal Failure, Multiple Myeloma, Heart Failure, Coronary Artery Disease, Chronic Obstructive Pulmonary Disease, Diabetes | Convalescent Plasma, Dexamethasone, Empiric Vitamin C, Thiamine | NP | 2 |
| P019 | 40-45 | F | OP | Unknown                                                                                                                  | Unknown                                                         | NP | 2 |
| P020 | 55-60 | M | OP | Chronic Liver Disease, Liver Failure, Anemia, Coronary Artery Disease, Diabetes                                          | None                                                            | NP | 2 |

560 <sup>1</sup>at sample collection. IP = inpatient, ER = emergency room, OP = outpatient, NH = nursing

561 home, NP = nasopharyngeal, OP = oropharyngeal

562

563 **S2 Table. Data availability (NCBI Bioproject PRJNA610428).**

| Patient | Sample # | GISAID accession |
|---------|----------|------------------|
| P001    | 1        | EPI_ISL_792092   |
|         | 2        | EPI_ISL_570115   |
| P003    | 1        | EPI_ISL_416643   |
|         | 2        | EPI_ISL_418914   |
| P005    | 1        | EPI_ISL_427186   |
|         | 2        | NA               |
| P006    | 1        | EPI_ISL_416454   |
|         | 1        | EPI_ISL_792093   |
| P007    | 1        | EPI_ISL_416448   |
|         | 2        | EPI_ISL_418942   |
| P008    | 1        | EPI_ISL_424228   |
|         | 2        | EPI_ISL_461429   |
| P009    | 1        | EPI_ISL_570975   |
|         | 2        | EPI_ISL_792094   |
| P010    | 1        | EPI_ISL_416717   |
|         | 2        | EPI_ISL_515280   |
|         | 3        | EPI_ISL_792095   |

|      |   |                |
|------|---|----------------|
|      | 4 | EPI_ISL_486097 |
| P011 | 1 | EPI_ISL_570059 |
|      | 2 | EPI_ISL_486102 |
|      | 3 | EPI_ISL_461405 |
| P012 | 1 | EPI_ISL_424190 |
|      | 1 | EPI_ISL_424205 |
| P013 | 1 | EPI_ISL_792096 |
|      | 2 | EPI_ISL_460634 |
| P014 | 1 | EPI_ISL_486103 |
|      | 2 | EPI_ISL_792097 |
| P015 | 1 | EPI_ISL_424262 |
|      | 2 | EPI_ISL_485994 |
|      | 3 | EPI_ISL_792098 |
| P016 | 1 | EPI_ISL_570071 |
|      | 2 | EPI_ISL_825015 |
|      | 3 | EPI_ISL_486110 |
| P017 | 1 | EPI_ISL_792099 |
|      | 2 | EPI_ISL_570078 |
| P018 | 1 | NA             |
|      | 2 | NA             |
| P019 | 1 | EPI_ISL_570762 |
|      | 2 | EPI_ISL_570779 |
| P020 | 1 | NA             |
|      | 2 | EPI_ISL_570503 |

564

565

566 **S3 Table. Samples used for host gene expression analysis using RNAseq.**

| Patient | Sample # | COVID Positivity | Reads Pseudo-aligned to Human Transcriptome |
|---------|----------|------------------|---------------------------------------------|
| P001    | 1        | repeat           | 914378                                      |
| P002    | 1        | initial          | 1458465                                     |

|      |   |         |          |
|------|---|---------|----------|
| P003 | 1 | initial | 920298   |
| P003 | 2 | repeat  | 2115575  |
| P004 | 1 | initial | 11890988 |
| P007 | 2 | repeat  | 2450327  |
| P008 | 1 | initial | 1113231  |
| P009 | 1 | initial | 5543628  |
| P015 | 1 | initial | 1544930  |
| P016 | 1 | initial | 1179241  |

567

568 **S4 Table. Clinically relevant taxa.**

| Name                                                  | Rank | taxID   |
|-------------------------------------------------------|------|---------|
| Adenoviridae                                          | F    | 10508   |
| Human coronavirus HKU1                                | S    | 290028  |
| Rousettus bat coronavirus HKU9                        | S    | 694006  |
| Human coronavirus NL63                                | S    | 277944  |
| Human coronavirus 229E                                | S    | 11137   |
| Severe acute respiratory syndrome-related coronavirus | S    | 694009  |
| Enterovirus                                           | G    | 12059   |
| Rhinovirus C                                          | S    | 463676  |
| Propionibacterium phage PacnesP2                      | S    | 1983621 |
| Propionibacterium phage pa33                          | S    | 2079406 |
| Propionibacterium phage Aquarius                      | S    | 2041558 |
| Propionibacterium phage Moyashi                       | S    | 1654781 |
| Propionibacterium phage PHL055N00                     | S    | 1500802 |
| Propionibacterium virus Pacnes201215                  | S    | 1982270 |

|                                                |   |         |
|------------------------------------------------|---|---------|
| Propionibacterium phage Pacnes 2012-15         | - | 1498188 |
| Streptococcus virus MS1                        | S | 1962672 |
| environmental samples                          | - | 2100420 |
| uncultured Caudovirales phage                  | S | 2100421 |
| unclassified Papillomaviridae                  | - | 333774  |
| Human papillomavirus types                     | - | 173087  |
| Human papillomavirus                           | S | 10566   |
| Betacoronavirus BtCoV/Rhi_hip/R8-09/SPA/2010   | S | 1346312 |
| Bat Hp-betacoronavirus Zhejiang2013            | S | 2501961 |
| Bat Hp-betacoronavirus/Zhejiang2013            | - | 1541205 |
| Colobus guereza                                | S | 33548   |
| Influenza A virus                              | S | 11320   |
| Bordetella pertussis                           | S | 520     |
| Staphylococcus aureus                          | S | 1280    |
| Staphylococcus aureus                          | S | 1280    |
| Haemophilus influenzae                         | S | 727     |
| Pseudomonas aeruginosa                         | S | 287     |
| Pseudomonas oleovorans/pseudoalcaligenes group | - | 1232139 |
| Streptococcus pneumoniae                       | S | 1313    |
| Streptococcus sp. A12                          | S | 1759399 |
| Streptococcus pseudopneumoniae                 | S | 257758  |
| Streptococcus pseudopneumoniae IS7493          | - | 1054460 |
| Streptococcus sp. I-G2                         | S | 1156431 |

|                       |   |     |
|-----------------------|---|-----|
| Moraxella catarrhalis | S | 480 |
|-----------------------|---|-----|

569
